# Supplementary material
Source: Springer Nature journal article supplement (https://www.springermedizin.de/resource/supplementary/12884_2013_854_MOESM3_ESM.pdf/9458354)

Number of births

Ratio

%

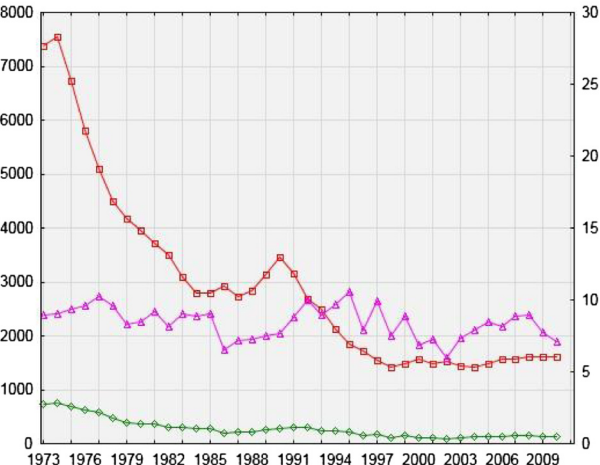

- Number of 1-para
- Ratio of 2+ para of all deliveries
- Number of 2+ para

Supplement: MOESM3 [file 9458354]
